# Supplementary material
Source: MDPI journal article supplement (https://www.mdpi.com/1424-8247/15/7/854)
Supplement: s1 [file s1]

# Curcumin-based $\beta$ -diketo ligands for $\text{Ga}^{3+}$ : on the way to develop new antineoplastic agents

Debora Carrozza<sup>1</sup>, Matteo Mari<sup>1</sup>, Gianluca Malavasi<sup>1</sup>, Ettore Venturi<sup>1</sup>, Giulia Avino<sup>2</sup>, Pier Cesare Capponi<sup>3</sup>, Michele Iori<sup>3</sup>, Sara Rubagotti<sup>3</sup>, Silvia Belluti<sup>4</sup>, Mattia Asti<sup>3</sup>, Erika Ferrari<sup>1,\*</sup>

<sup>1</sup> Department of Chemical and Geological Sciences, University of Modena and Reggio Emilia, via G. Campi 103, 41125, Modena, Italy; [erika.ferrari@unimore.it](mailto:erika.ferrari@unimore.it)

<sup>2</sup> Department of Chemical and Pharmaceutical Sciences, University of Trieste, via L. Giorgieri 1, 34127, Trieste, Italy.; [gavino@units.it](mailto:gavino@units.it)

<sup>3</sup> Radiopharmaceutical Chemistry Section, Nuclear Medicine Unit, Azienda USL-IRCCS Reggio Emilia, via Amendola 2, 42122, Reggio Emilia, Italy.; [mattia.asti@ausl.re.it](mailto:mattia.asti@ausl.re.it)

<sup>4</sup> Department of Life Sciences, University of Modena and Reggio Emilia, via G. Campi 183, 41125, Modena, Italy; [silvia.belluti@unimore.it](mailto:silvia.belluti@unimore.it)

\* Correspondence: [erika.ferrari@unimore.it](mailto:erika.ferrari@unimore.it), Tel.: +39 059 205 8631

Figure S1.

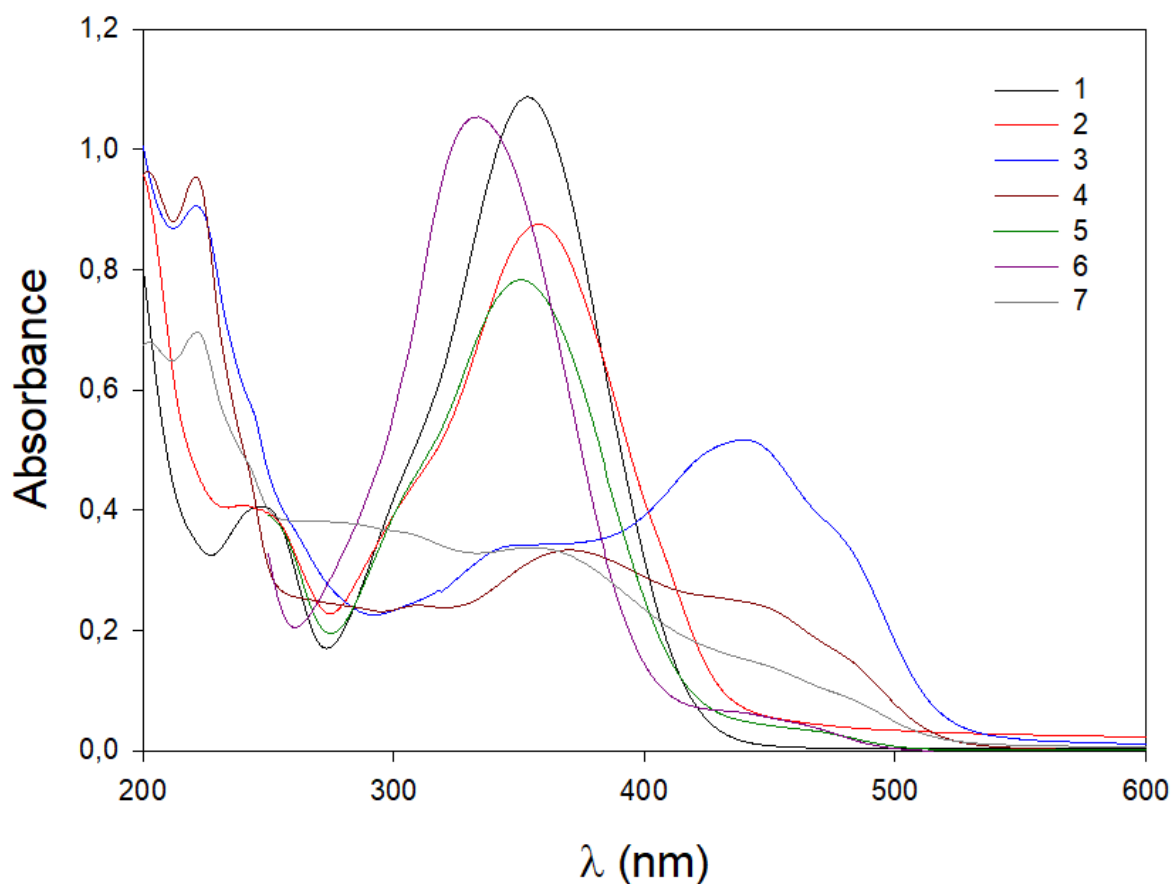

**Figure S1.** UV-Vis spectra of the investigated compounds at 25°C in aqueous solution ( $[L] = 50 \mu\text{M}$ ,  $[\text{NaNO}_3] = 0.1 \text{ M}$ , 298 K).

**Figure S2.**

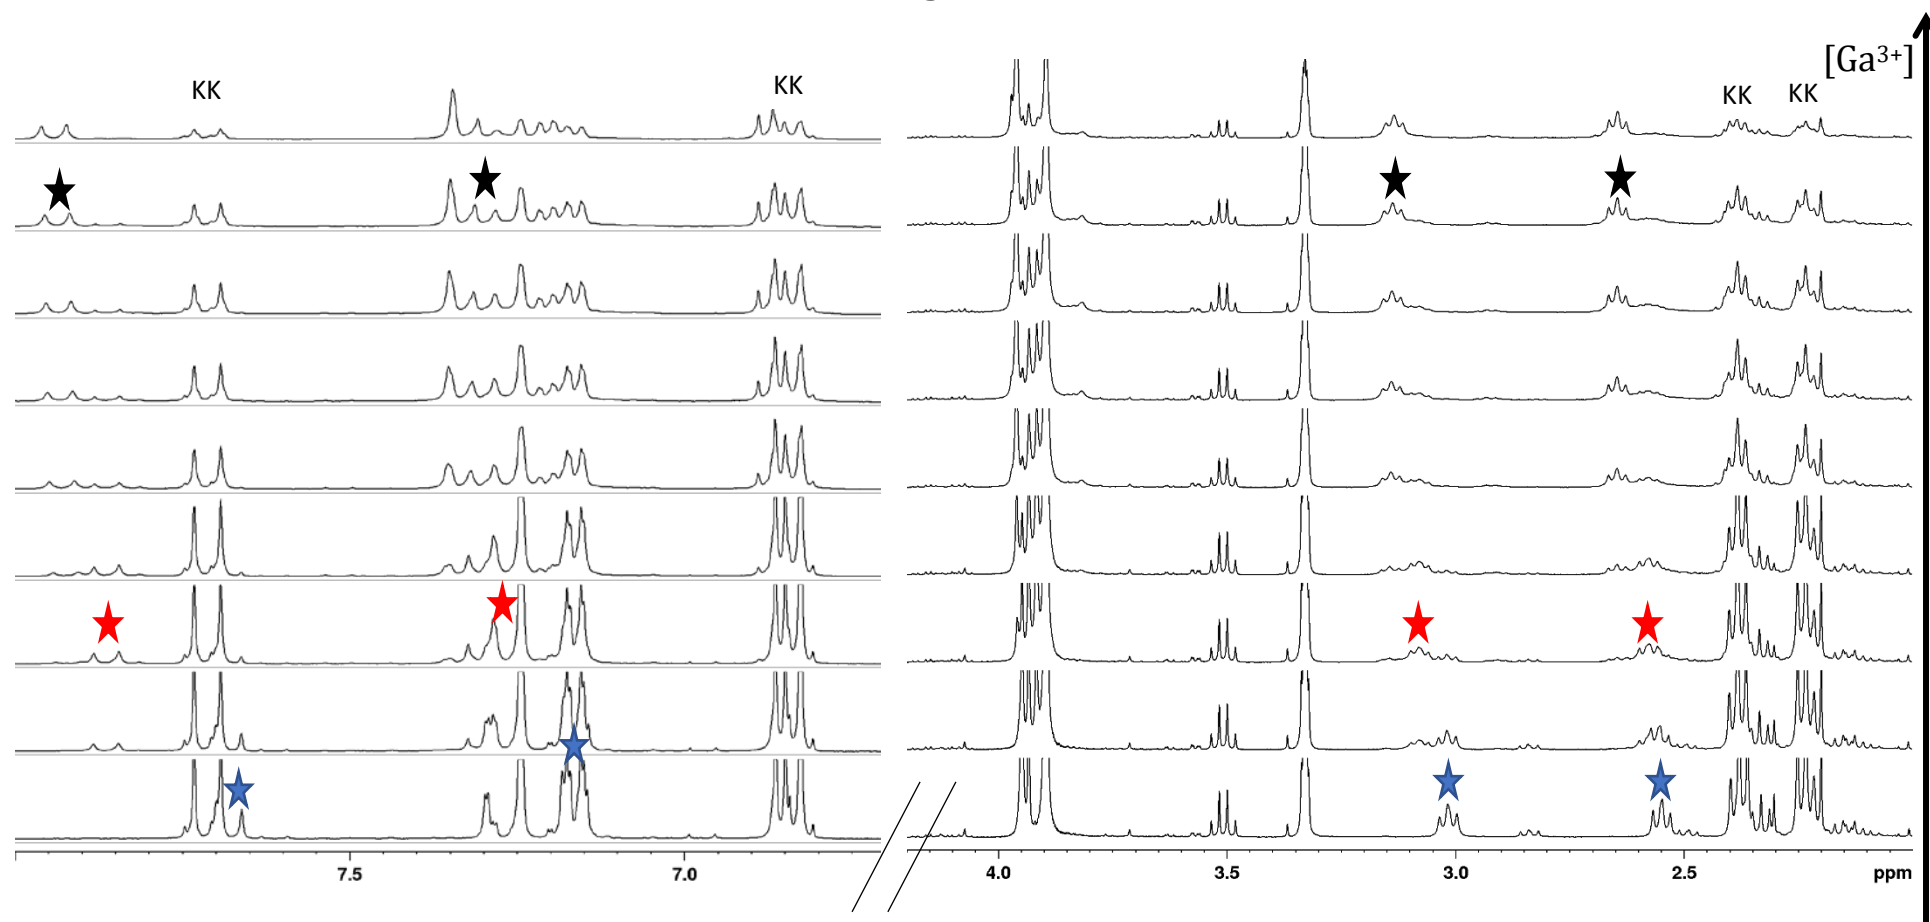

**Figure S2.** <sup>1</sup>H NMR spectra of compound 7 in MeOD-*d*<sub>4</sub> at 298K (@600 MHz) at increasing addition of Ga<sup>3+</sup> MeOD-*d*<sub>4</sub> solution up to the metal-to-ligand 1:1.5 molar ratio. Stars highlights resonances of protons H-3, H-4, H-11 and H-12 in the free ligand (blue), M:L 1:2 complex (red) and M:L 1:1 complex (black). Analogous resonances for the di-keto form are labelled with KK and are unaffected by metal addition.

**Figure S3.**

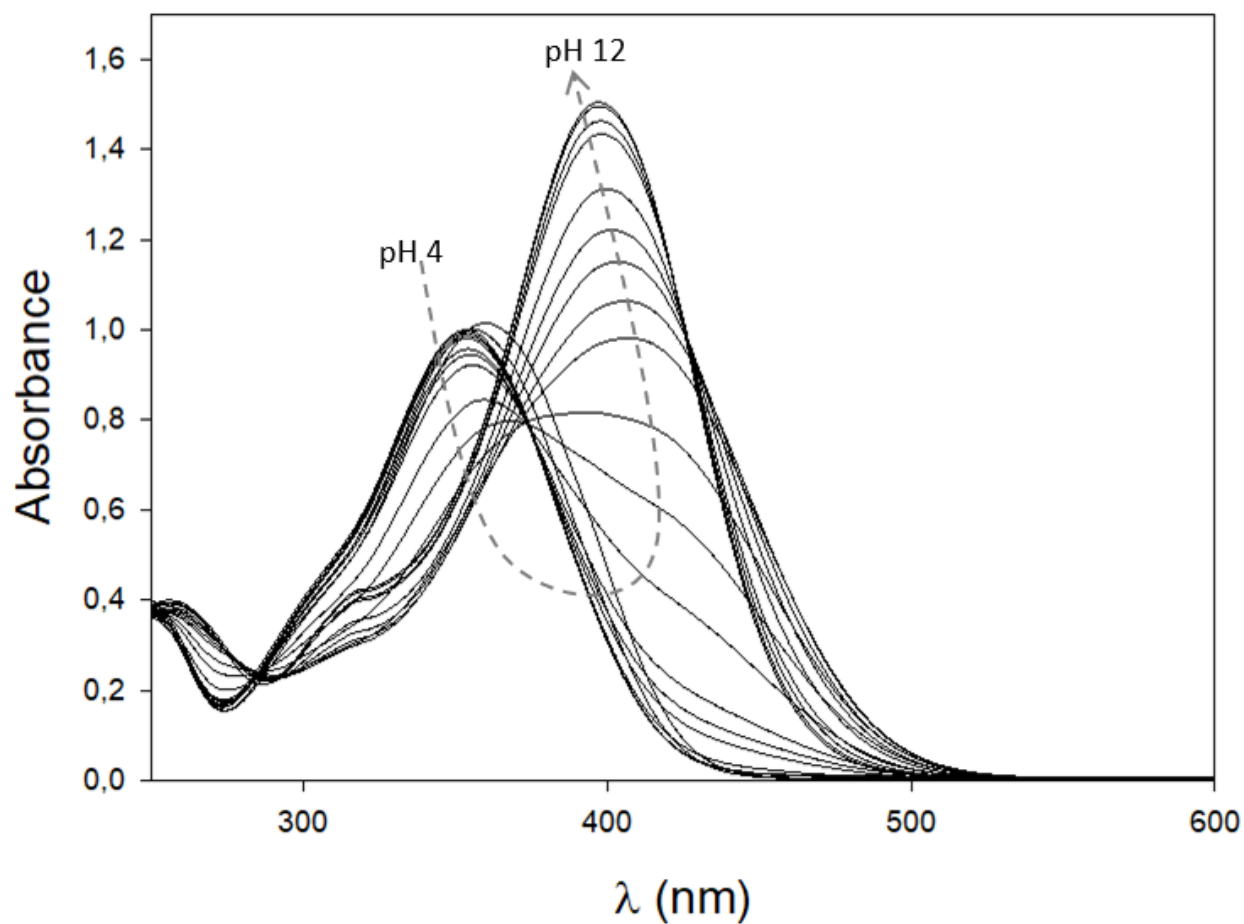

**Figure S3.** pH-metric spectrophotometric titration of  $\text{Ga}^{3+}$ :1 1:1 system in aqueous solution ( $[\text{L}] = 50\mu\text{M}$ ;  $[\text{NaNO}_3] = 0.1 \text{ M}$ , 298 K).

**Figure S4.**

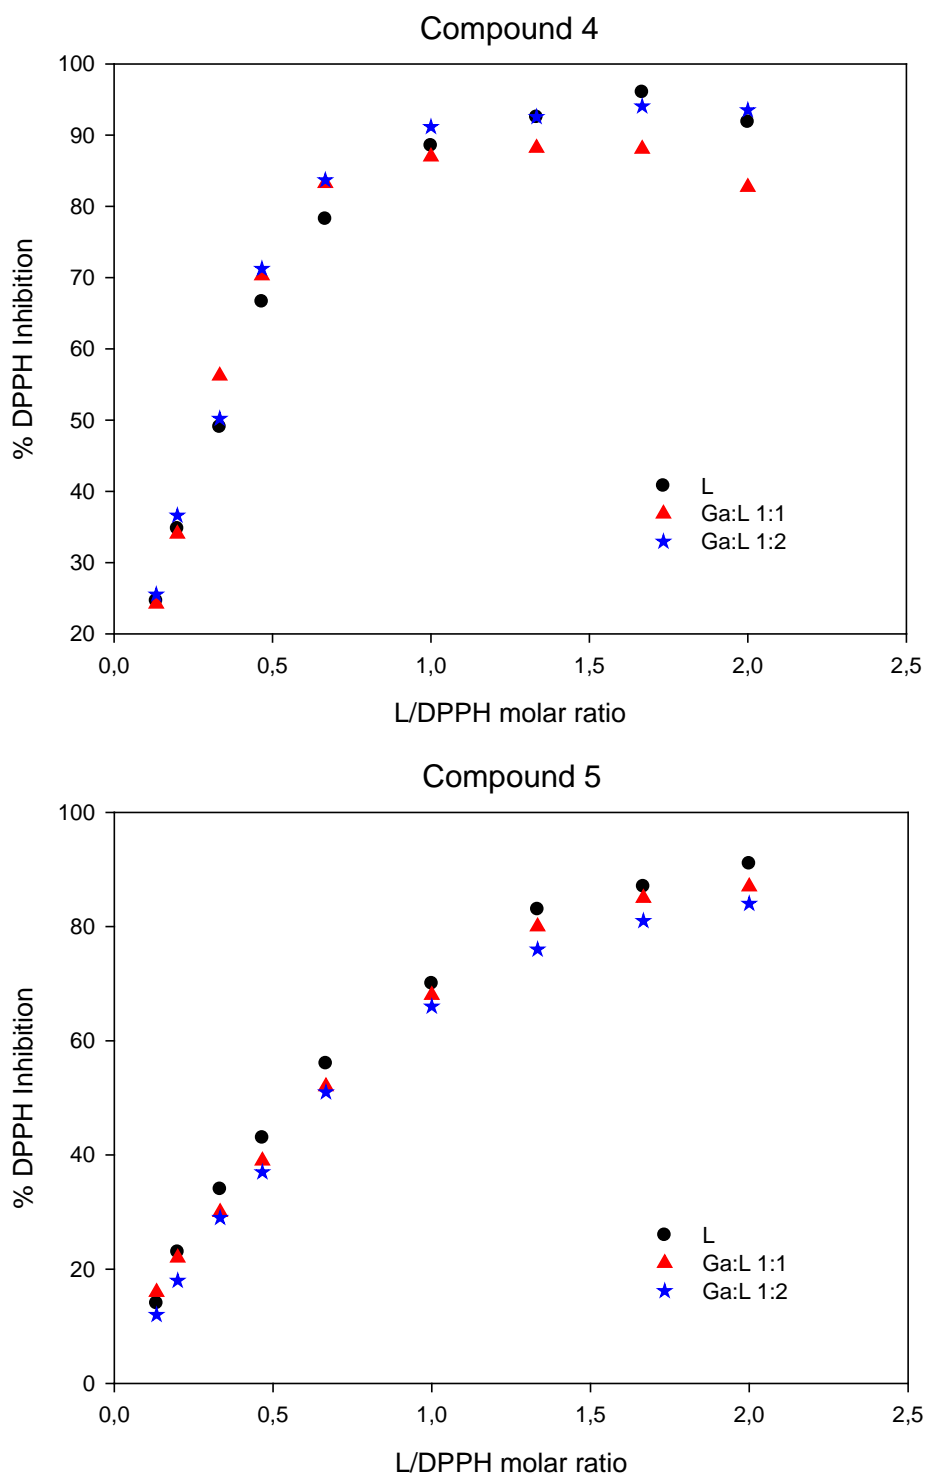

**Figure S4.** Radical scavenging ability of derivatives **4** and **5** together with their Ga<sup>3+</sup> metal complexes. Percentage of inhibition of free DPPH radical ([DPPH] = 60  $\mu$ M) in the presence of the compound (free ligand (L) and gallium complexes) at increasing concentration. Compound concentration is expressed as molar ratio (L/DPPH).

**Table S1.** Liquid chromatography/mass spectrometry (LC/MS) results (*m/z*) for Gallium(III) complexes.

| Compound | Formula                                                                            | [M+H] <sup>+</sup> |
|----------|------------------------------------------------------------------------------------|--------------------|
| 1        | [Ga(C <sub>13</sub> H <sub>13</sub> O <sub>4</sub> ) <sub>2</sub> ] <sup>+</sup>   | 536.11             |
| 2        | [Ga(C <sub>16</sub> H <sub>18</sub> BrO <sub>4</sub> ) <sub>2</sub> ] <sup>+</sup> | 776.02             |
| 3        | [Ga(C <sub>29</sub> H <sub>22</sub> NO <sub>6</sub> ) <sub>2</sub> ] <sup>+</sup>  | 1046.30            |
| 4        | [Ga(C <sub>32</sub> H <sub>28</sub> NO <sub>8</sub> ) <sub>2</sub> ] <sup>+</sup>  | 1178.35            |
| 5        | [Ga(C <sub>30</sub> H <sub>24</sub> NO <sub>6</sub> ) <sub>2</sub> ] <sup>+</sup>  | 1058.29            |
| 6        | [GaC <sub>23</sub> H <sub>22</sub> O <sub>6</sub> ] <sup>+</sup>                   | 448.09             |
| 7        | [GaC <sub>25</sub> H <sub>26</sub> O <sub>8</sub> ] <sup>+</sup>                   | 524.12             |
